# Supplementary material for: Results from the Upper Limb International Spasticity Study-II (ULIS-II): a large, international, prospective cohort study investigating practice and goal attainment following treatment with botulinum toxin A in real-life clinical management
Source: HighWire-hosted journal article supplement (doi:10.1136/bmjopen-2013-002771), 2013-06-01
Supplement: bmjopen-2013-002771corr1supp.pdf [file bmjopen-2013-002771corr1supp.pdf]

## Investigators and participating recruitment centres

### Australia

| Principal investigator | Sub-investigator(s) | Recruitment site address                                                                     |
|------------------------|---------------------|----------------------------------------------------------------------------------------------|
| Steven Faux, MD        | Josephine Braid, MD | St Vincent's Hospital<br>170 Darlinghurst Road<br>Darlinghurst, NSW<br>2010                  |
| Brian Zeman, MD        | N/A                 | Royal Rehabilitation Centre Sydney<br>59 Charles Street,<br>P.O. Box 6,<br>Ryde, NSW<br>1680 |
| Clayton King, MD       | N/A                 | Royal North Shore Hospital<br>Reserve Road,<br>St Leonards, NSW<br>2065                      |
| Ian Baguley, MD        | Shea Morrison, MD   | St Joseph's Hospital<br>Normanby Road,<br>Auburn, NSW<br>2144                                |
| Arun Aggarwal, MD      | Darren Lee, MD      | Royal Prince Alfred Hospital<br>Missendon Road<br>Camperdown, NSW<br>2050                    |
| Michael Pollack, MD    | N/A                 | John Hunter Hospital<br>Lookout Rd<br>Rankin Park, NSW<br>2287                               |

## Austria

| <b>Principal investigator</b> | <b>Sub-investigator(s)</b> | <b>Recruitment site address</b>                                                               |
|-------------------------------|----------------------------|-----------------------------------------------------------------------------------------------|
| Klemens Fheodoroff , MD       | N/A                        | Gaital-Kliniken Hermagor<br>Neurorehabilitation<br>Radniger Strasse 12<br>A-9620<br>Hermagor  |
| OA Johann Rappold, MD         | N/A                        | Landeskrinikum Thermenregion<br>Hohegg<br>Hoheggerstrasse 88<br>A-2840<br>Grimmenstein-Hohegg |

## Belgium

| <b>Principal investigator</b> | <b>Sub-investigator(s)</b>                  | <b>Recruitment site address</b>                                                                                            |
|-------------------------------|---------------------------------------------|----------------------------------------------------------------------------------------------------------------------------|
| Els Van Tichelt, MD           | N/A                                         | Revalidatieziekenhuis Hof ter Schelde<br>August Vermeylenlaan 6<br>2050<br>Antwerpen                                       |
| Geert Vanhooren, MD           | Michel Van Zandijcke, MD                    | AZ St. Jan<br>Ruddershove 10<br>8000<br>Brugge                                                                             |
| Thierry Deltombe, MD<br>PhD   | N/A                                         | Cliniques Universitaires UCL de Mont-<br>Godinne<br>Avenue Dr. G. Therasse<br>5530<br>Yvoir                                |
| Thierry Lejeune, MD PhD       | Benjamin Bollens, MD<br>Gaëtan Stoquart, MD | UCL St. Luc<br>Département de médecine physique et de<br>readaptation motrice<br>Avenue Hippocrate 10<br>1200<br>Bruxelles |

## Czech Republic

| <b>Principal investigator</b> | <b>Sub-investigator(s)</b> | <b>Recruitment site address</b>                                            |
|-------------------------------|----------------------------|----------------------------------------------------------------------------|
| Edvard Ehler, MD              | N/A                        | Hospital Pardubice, Neurology Dept.<br>Kyjevska 44,<br>530 03<br>Pardubice |
| Martin Bares, MD PhD          | N/A                        | Faculty Hospital Brno, Neurology Dept.<br>Pekarska 53,<br>656 91<br>Brno   |

## Denmark

| <b>Principal investigator</b> | <b>Sub-investigator(s)</b> | <b>Recruitment site address</b>                                                           |
|-------------------------------|----------------------------|-------------------------------------------------------------------------------------------|
| Thomas Truelsen, MD           | N/A                        | Department of Neurology<br>Herlev Hospital<br>Herlev Ringvej<br>2730 Herlev<br>Copenhagen |

## Finland

| Principal investigator | Sub-investigator(s) | Recruitment site address                                                                                                                    |
|------------------------|---------------------|---------------------------------------------------------------------------------------------------------------------------------------------|
| Petteri Maunu, MD      | N/A                 | Neurologiska Polikliniken<br>Tampere University Hospital<br>33521<br>Tampere                                                                |
| Niko Tieranta, MD      | N/A                 | Invalidförbundets Rehabiliteringscenter i<br>Lapland<br>Pohjolankatu 14<br>96100<br>Rovaniemi                                               |
| Jari Ylinen, MD        | N/A                 | Department of Physical and<br>Rehabilitation Medicine<br>Central Hospital of Central Finland<br>Keskussairaalantie 19<br>40620<br>Jyväskylä |

## France

| Principal investigator          | Sub-investigator(s)                           | Recruitment site address                                                                                                   |
|---------------------------------|-----------------------------------------------|----------------------------------------------------------------------------------------------------------------------------|
| Claire Aymard, MD               | N/A                                           | Médecine Physique et de Réadaptation<br>Fondation Hospitalière Sainte Marie<br>167 rue raymond Losserand<br>75014<br>Paris |
| Isabelle Bonan, MD, PhD         | N/A                                           | Hôpital Pontchaillou<br>Rééducation Fonctionnelle<br>2 rue Henri le Guilloux<br>35033<br>Rennes Cedex 9                    |
| François Boyer, MD, PhD         | Jean-Michel Coulon, MD<br>Frédéric Delmer, MD | Dr BOYER<br>Hôpital Sébastopol<br>Rééducation Fonctionnelle<br>48 rue de Sébastopol<br>51092<br>Reims Cedex                |
| Jean-Yves Salle, MD, PhD        | N/A                                           | Dr SALLE<br>Hopital Jean Rebeyrol<br>Médecine Physique et de Réadaptation<br>Avenue du Buisson<br>87031<br>Limoges Cedex 1 |
| Dominique Perennou, MD,<br>PhD  | Patrice Davoine, MD                           | CHU Hôpital SUD<br>Institut de Rééducation<br>B.P. 338 - Avenue Kimberley<br>38434<br>Echirolles Cedex                     |
| Anne-Laure Ferrapie, MD         | Isabelle Richard, MD, PhD                     | Centre Régional de Rééducation et<br>Réadaptation fonctionnelle<br>Rue des Capucins - BP 40329<br>49103<br>Angers Cedex 2  |
| Nicolas Bayle, MD               | Jean-Michel Gracies,<br>MD, PhD               | Hopital Albert Chenevier<br>Neurologie<br>40 Rue de Mesly<br>94010<br>Créteil Cedex                                        |
| Marie-Eve Isner-Horobeti,<br>MD | N/A                                           | Hôpital Hautepierre<br>Rééducation fonctionnelle<br>1 avenue Molière<br>67098<br>Strasbourg Cedex 2                        |
| Claire Delleci, MD              | N/A                                           | Hôpital Pellegrin<br>Rééducation fonctionnelle<br>Place Amélie Raba Léon<br>33076<br>Bordeaux Cedex                        |

|                           |                      |                                                                                                                                |
|---------------------------|----------------------|--------------------------------------------------------------------------------------------------------------------------------|
| Serdar Kocer, MD          | N/A                  | Centre Médecine Physique Réadaptation<br>Rééducation Neurologique<br>Départementale 96<br>77170<br>Coubert                     |
| Bernard Parratte, MD, PhD | Pierre Decavel, MD   | Hôpital Jean Minjoz<br>Méd.physique réadaptation<br>3 Bd Alexandre Fleming<br>25030<br>Besançon Cedex                          |
| Joanna Rome, MD           | Angélique Stefan, MD | CHU de Nantes<br>Médecine physique et de réadaptation<br>neurologique<br>85 rue Saint-Jacques<br>44093<br>Nantes Cedex 1       |
| Laurent Bensoussan, MD    | N/A                  | Hôpital Timone Adultes<br>Rééducation fonctionnelle<br>Boulevard Jean-Moulin<br>13385<br>Marseille Cedex 5                     |
| Christophe Roth, MD       | N/A                  | Centre de Rééducation Fonctionnelle du<br>Mont Veyrier<br>Rééducation fonctionnelle<br>475 Rout Monthonnex<br>74370<br>Argonay |



## Germany

| <b>Principal investigator</b> | <b>Sub-investigator(s)</b> | <b>Recruitment site address</b>                                                                                                |
|-------------------------------|----------------------------|--------------------------------------------------------------------------------------------------------------------------------|
| Gerhard Reichel, MD           | Andrea Stenner, MD         | Paracelsus Klinik<br>Competence Centre for Movement Disorders<br>Werdauer Strasse 68<br>08060<br>Zwickau                       |
| Peter Kossmehl, MD            | N/A                        | Klinik für Neurologie<br>Kliniken Beelitz<br>Paracelsusring 6a<br>14547<br>Beelitz                                             |
| Hartwig Woldag, MD            | N/A                        | NRZ Neurologisches<br>Rehabilitationszentrum Leipzig<br>Muldenalweg 1<br>04828<br>Bennewitz                                    |
| Dirk Dressler, MD PhD         | Katja Kollwe, MD           | Neurologische Klinik<br>Kliniken der Medizinischen Hochschule<br>Hannover (MHH)<br>Carl-Neuberg-Strasse 1<br>30625<br>Hannover |
| Beate Patzner, MD             | N/A                        | Sächsisches Krankenhaus für Neurologie<br>und Psychiatrie<br>Neurologische Klinik<br>Hufelandstrasse 15<br>01477<br>Arnsdorf   |
| Stefan Unglaub, MD            | N/A                        | Praxis für Neurologie<br>Dalbergerstrasse 6<br>65929<br>Frankfurt am Main                                                      |

## Hong Kong

| <b>Principal investigator</b>  | <b>Sub-investigator(s)</b>                    | <b>Recruitment site address</b>                                     |
|--------------------------------|-----------------------------------------------|---------------------------------------------------------------------|
| Leonard Sheung Wai Li,<br>MBBS | Leung Ching Man, MBBS<br>Leung Kwok Pui, MRCP | Tung Wah Hospital<br>12 Po Yan Street, Sheung Wan,<br>Hong Kong SAR |

## Italy

| <b>Principal investigator</b> | <b>Sub-investigator(s)</b>                       | <b>Recruitment site address</b>                                                                                                                                                |
|-------------------------------|--------------------------------------------------|--------------------------------------------------------------------------------------------------------------------------------------------------------------------------------|
| Franco Molteni, MD            | N/A                                              | Ospedale Valduce<br>Villa Beretta<br>Via N. Sauro, 17<br>23845<br>Costamasnaga (LC)                                                                                            |
| Giovanni Checchia, MD         | Carmelo Lentino, MD                              | Laboratorio Analisi del Movimento<br>U.O.R.R.F.<br>Ospedale "Santa Corona"<br>Via XXV Aprile, 38<br>17027<br>Pietra Ligure (SV)                                                |
| Marzia Millevolte, MD         | N/A                                              | Clinica di Neuroriabilitazione<br>A.O.U. Ospedali Riuniti<br>Via Conca, 1<br>60020<br>Ancona                                                                                   |
| Manuela Diverio, MD           | Elena Pastorini, MD<br>Valentina Cianferotti, MD | Fondazione Don Gnocchi Onlus<br>Polo Riabilitativo del Levante Ligure<br>Ospedale S. Bartolomeo<br>Via Cisa Vecchia<br>19039<br>Sarzana (SP)                                   |
| Carmelo Chisari, MD PhD       | N/A                                              | Dipartimento di Neuroriabilitazione<br>Ospedale Cisanello<br>Via Paradisa, 1<br>56124<br>Pisa                                                                                  |
| Mario Manca, MD               | N/A                                              | Dipartimento di Medicina Riabilitativa<br>"S. Giorgio" Modulo Laboratorio Analisi<br>del Movimento<br>Azienda Ospedaliera Universitaria<br>Via della Fiera<br>44100<br>Ferrara |

## Malaysia

| <b>Principal investigator</b> | <b>Sub-investigator(s)</b>               | <b>Recruitment site address</b>                                                                                                                  |
|-------------------------------|------------------------------------------|--------------------------------------------------------------------------------------------------------------------------------------------------|
| Goh Khean-Jin, MD PhD         | Saini Jeffery bin Freddy<br>Abdullah, MD | Universiti Malaya Medical Center<br>Department of Neurology / Department<br>of Rehabilitation Medicine<br>Lembah Pantai<br>59100<br>Kuala Lumpur |
| Mak Choon Soon, MD            | N/A                                      | Hospital Kuala Lumpur<br>50586 Jalan Pahang,<br>Wilayah Persekutuan<br>Kuala Lumpur                                                              |

## Mexico

| <b>Principal investigator</b> | <b>Sub-investigator(s)</b>                                       | <b>Recruitment site address</b>                                                                                                        |
|-------------------------------|------------------------------------------------------------------|----------------------------------------------------------------------------------------------------------------------------------------|
| Francisco Jiménez, MD         | Silvia Porras, MD<br>Jorge Ramírez, MD<br>Rosa Ávila, MD         | Gil Private Consulting Room<br>Calle Garibaldi 1783<br>Colonia Ladrón de Guevara<br>Guadalajara, Jalisco<br>44650                      |
| Carlos Cuevas, MD             | Salvador Velazquez Osuna,<br>MD<br>Octavio Martinez Leyva,<br>MD | Angeles del Pedregal Hospital<br>Torre Quirurgica<br>Camino a Sta Teresa N° 1055<br>Colonia Heroes de Padierna<br>México City<br>10700 |

## Philippines

| <b>Principal investigator</b> | <b>Sub-investigator(s)</b> | <b>Recruitment site address</b>                                                       |
|-------------------------------|----------------------------|---------------------------------------------------------------------------------------|
| Raymond Rosales, MD           | N/A                        | Metropolitan Medical Center<br>1357 G Masangkay St. Tondo<br>Manila                   |
| Jeanne Flordelis, MD          | N/A                        | Perpetual Succour Hospital<br>Gorordo Avenue, Lahug,<br>Cebu City 6000<br>Philippines |

## Portugal

| <b>Principal investigator</b> | <b>Sub-investigator(s)</b>                                   | <b>Recruitment site address</b>                                                                                                           |
|-------------------------------|--------------------------------------------------------------|-------------------------------------------------------------------------------------------------------------------------------------------|
| Jorge Jacinto, MD             | Luís Gonçalves, MD                                           | Serviço de Fisiatria<br>Centro de Medicina de Reabilitação de<br>Alcoitão, R. Conde Barão, Alcoitão<br>2649-560<br>Alcabideche            |
| Maria João Andrade, PhD       | N/A                                                          | Serviço de Fisiatria<br>Hospital Geral de Santo Antonio, Centro<br>Hospitalar do Porto - Largo Prof. Abel<br>Salazar<br>4099-001<br>Porto |
| Ana Rolo Duarte, MD           | N/A                                                          | Serviço de Fisiatria<br>Hospital Egas Moniz, Centro Hospitalar<br>Lisboa Ocidental, Rua da Junqueira, 126,<br>1349-019<br>Lisboa          |
| Eduarda Afonso, MD            | Katia Ferreira, MD<br>Guida Barata, MD                       | Serviço de Fisiatria<br>Hospital Distrital de Faro, Rua Leão<br>Penedo,<br>8000-386<br>Faro                                               |
| Renato Nunes, MD              | Iolanda Veiros, MD<br>Susana Santos, MD<br>Tiago Ribeira, MD | Serviço de Fisiatria<br>Centro Hospitalar de Coimbra - Quinta<br>dos Vales, São Martinho do Bispo<br>3046-853<br>Coimbra                  |

## Russia

| Principal investigator       | Sub-investigator(s)                              | Recruitment site address                                                                                                                                                                     |
|------------------------------|--------------------------------------------------|----------------------------------------------------------------------------------------------------------------------------------------------------------------------------------------------|
| Svetlana Khatkova, MD<br>PhD | N/A                                              | Federal State Institution “Medical Rehabilitation Centre of Roszdrav”<br>3, Ivankovskoye highway<br>125367<br>Moscow                                                                         |
| Dina Khasanova, MD PhD       | Natalia Agafonova, MD                            | State Institution “Interregional clinical diagnostic centre”<br>12a, Karbyisheva str.<br>420101<br>Kazan                                                                                     |
| Ludmila Korenko, MD<br>PhD   | N/A                                              | State Educational Institution of high professional education “St-Peterburg state medical university named after I.P. Pavlov of Roszdrav”<br>6/8 L’va Tolstogo str.<br>197022<br>St-Peterburg |
| Ludmila Antipova, MD<br>PhD  | N/A                                              | Municipal health care institution “City hospital #2 “Krasnodar Multidisciplinary medical diagnostic association”<br>6/2, Krasnikh partisan str.<br>350012<br>Krasnodar                       |
| Larisa Sperling, MD PhD      | N/A                                              | State Novosibirsk Regional Clinical Diagnostic Centre<br>6/7, Zaleskogo str.<br>630047<br>Novosibirsk                                                                                        |
| Dmitry Popov, MD PhD         | Galina Belskaya, MD PhD<br>Irina Lukashevich, MD | Municipal health care institution “City clinical hospital #3”<br>287, prospect Pobedi<br>454136<br>Chelyabinsk                                                                               |
| Dmitry Pokhabov, MD<br>PhD   | Vladislav Abramov, MD<br>Yuliya Nesterova, MD    | State Educational Institution of high professional education “Krasnoyarsk State Medical Academy of Roszdrav”<br>1, Partyzana Zheleznnyaka str.<br>660022<br>Krasnoyarsk                      |



## Singapore

| <b>Principal investigator</b> | <b>Sub-investigator(s)</b> | <b>Recruitment site address</b>                                                              |
|-------------------------------|----------------------------|----------------------------------------------------------------------------------------------|
| Kong Keng He, MD              | Karen Chua Sui Geok, MD    | Tan Tock Seng Hospital<br>TTSH Rehabilitation Centre<br>17 Ang Mo Kio Ave 9<br>569 766       |
| Ng Yee Sein, MD               | N/A                        | Singapore General Hospital<br>Department of Rehabilitation Medicine<br>Outram Road<br>169608 |

## South Korea

| Principal investigator    | Sub-investigator(s) | Recruitment site address                                                                                                                       |
|---------------------------|---------------------|------------------------------------------------------------------------------------------------------------------------------------------------|
| Deog Young Kim, MD<br>PhD | N/A                 | Dept. of Rehabilitation Yonsei<br>University Severance hospital, #134<br>Shinchon-dong, Seodaemoon-gu<br>Seoul<br>120-752                      |
| Yun Hee Kim, MD PhD       | Won Hyuk Chang, MD  | Division of Neurorehabilitation Samsung<br>Medical Center, #50 Ilwon-dong,<br>Gangnam-gu<br>Seoul<br>135-710                                   |
| Nam Jong Paik, MD PhD     | Kyehee Cho, MD      | Dept. of Rehabilitation Seoul National<br>University Bundang Hospital,<br>#300 Gumi-dong, Bundang-gu,<br>Seongnam-si<br>Gyeonggi-do<br>463-707 |
| Sang Jee Lee, MD PhD      | N/A                 | Dept. of Rehabilitation Catholic<br>University Daejeon St. Mary's hospital,<br>520-2 Daeheung-dong, Jung-gu,<br>Daejeon-Si<br>301-723          |
| Min Ho Chun, MD PhD       | Bo Ryun Kim, MD     | Dept. for Rehabilitation Asan Medical<br>Center, #388-1 Pungnap-dong,<br>Songpa-gu<br>Seoul<br>138-736                                         |

## Spain

| <b>Principal investigator</b>  | <b>Sub-investigator(s)</b>   | <b>Recruitment site address</b>                                                                                |
|--------------------------------|------------------------------|----------------------------------------------------------------------------------------------------------------|
| Inmaculada Máñez Añón,<br>MD   | Dr. Cristina Roda, MD        | Hospital Universitario La Fe<br>Servicio de Rehabilitación<br>Av. Campanar, 21.<br>46009<br>Valencia           |
| Susana Moraleda Pérez,<br>MD   | Dr. Mercedes Martinez,<br>MD | Hospital La Paz<br>Servicio de Rehabilitación<br>Pº de la Castellana, 261.<br>28046<br>Madrid                  |
| Lourdes López de Munaín,<br>MD | N/A                          | Hospital Marqués de Valdecilla<br>Servicio de Rehabilitación<br>Av. Del Valdecilla, s/n.<br>39011<br>Santander |

## Sweden

| <b>Principal investigator</b> | <b>Sub-investigator(s)</b>                        | <b>Recruitment site address</b>                                      |
|-------------------------------|---------------------------------------------------|----------------------------------------------------------------------|
| Bo Danielsson, MD             | N/A                                               | Dept. Of Neurology, Mälarsjukhuset<br>631 88<br>Eskilstuna           |
| Ann Axelsson, MD              | Bodil Nilsson<br>Lena Magnusson<br>Erik Mårtenson | Östersunds Rehab Centrum,<br>Sollidenvägen 58<br>831 02<br>Östersund |

## Thailand

| <b>Principal investigator</b> | <b>Sub-investigator(s)</b> | <b>Recruitment site address</b>                                                                                                                              |
|-------------------------------|----------------------------|--------------------------------------------------------------------------------------------------------------------------------------------------------------|
| Witsanu Kumthornthip,<br>MD   | N/A                        | Siriraj Hospital<br>Department of Rehabilitation Medicine<br>9th Floor Srisangwan Building Siriraj<br>Hospital 2 Prannok Road Bangkoknoi<br>Bangkok<br>10700 |
| Areerat Suputtitada, MD       | N/A                        | King Chulalongkorn Memorial Hospital<br>Department of Rehabilitation Medicine<br>Jarern-Somsri Building Floor 1<br>Rama 4 Road, Patumwan<br>Bangkok<br>10330 |

## Taiwan

| <b>Principal investigator</b> | <b>Sub-investigator(s)</b> | <b>Recruitment site address</b>                                                                                                   |
|-------------------------------|----------------------------|-----------------------------------------------------------------------------------------------------------------------------------|
| Tsai Ching Piao, MD PhD       | N/A                        | Veteran General Hospital<br>No. 201, Sec. 2, Shih-Pai Road<br>Taipei 112                                                          |
| Chou Li Wei, MD               | N/A                        | China Medical University Hospital<br>Department of Physical Medicine &<br>Rehabilitation<br>2 Yuh-Der Road<br>Taichung City 40447 |

## United Kingdom

| <b>Principal investigator</b>  | <b>Sub-investigator(s)</b> | <b>Recruitment site address</b>                                                                                      |
|--------------------------------|----------------------------|----------------------------------------------------------------------------------------------------------------------|
| Rama Prasad, MD                | N/A                        | Lincoln County Hospital<br>Greetwell Road, Lincoln<br>Lincolnshire<br>LN2 5QY                                        |
| T Lal Landham, MD              | Clare Mehta, MBBS          | Medway Maritime Hospital<br>DSC Windmill Road, Gillingham<br>Kent<br>ME7 5NY                                         |
| Prabal Datta, MD               | N/A                        | Dewsbury District Hospital<br>Halifax Road, Dewsbury<br>West Yorkshire<br>WF13 4HS                                   |
| Magid Bakheit, MD PhD          | N/A                        | West Midlands<br>Rehabilitation Centre, 91 Oak tree Lane,<br>Selly Oak, Birmingham<br>West Midlands<br>B29 6HZ       |
| Lynne Turner-Stokes, MD<br>PhD | Stephen Ashford            | Middlesex, Regional Rehabilitation Unit,<br>Northwick Park Hospital, Watford Road,<br>Harrow<br>Middlesex<br>HA1 3UJ |
